# Supplementary material for: Influence of specific management practices on blood selenium, vitamin E, and beta‐carotene concentrations in horses and risk of nutritional deficiency
Source: PubMed Central journal article supplement — J Vet Intern Med. 2020 Jul 20;34(5):2132–41. doi: 10.1111/jvim.15862 (PMC7517834; doi:10.1111/jvim.15862), 2020-07-20
Supplement: JVIM-34-2132-s001.pdf [file JVIM-34-2132-s001.pdf]

General

**The main goal of this survey is to obtain a very detailed diet history including supplementation and medications. We hope to find correlation between different feeding practices and blood vitamin E and selenium levels in our sampled population.**

\* 1. Owner's Name:

\* 2. Owner's telephone number:

Only to be used to clarify answers if needed

\* 3. Owner's email address:

Only to be used to clarify answers if needed

\* 4. Horse's name:

5. Sex:

- Mare
- Spayed Mare
- Gelding
- Stallion

6. Breed:

7. Age:

**\* 8. Use of Horse:**

- Western Pleasure
- Trail Riding
- 3-Day Eventing
- English Pleasure
- Dressage
- Hunter/Jumper
- Cutting/Reining
- Endurance Riding
- Barrel Racing
- Other (please specify)

**\* 9. Length of ownership:**

**10. Current Medications, if any:**

**11. Current Medical Problems, if any:**

**\* 12. On average, how many days/week is this horse exercised?**

- No forced exercise
- 1
- 2
- 3
- 4
- 5
- 6
- 7

**13. On average, how many minutes is each exercise session?**

\* 14. Where do you obtain your nutritional recommendations?

Check all that apply

- Trainer
- Veterinarian
- Feed Store
- Friends
- Nutritionist
- Internet search
- Research/Journal articles
- Horse caretaker
- Books
- Farrier
- Educational Seminars
- Other (please specify)

\* 15. Pasture access, please select the best single answer

- Kept on pasture all year round
- Kept on pasture 1-5 months of the year
- Kept on pasture 6-12 months of the year
- Housed in a stall primarily but has daily pasture access of 1-6 hours
- Housed in a stall primarily but has daily pasture access of 7-12 hours
- Occasional hand grazing only
- No pasture access
- Other (please specify)

Diet

\* 16. Do you feed hay?

- Yes    If Yes, go to question 17
- No     If No, go to question 18

**In this case we assume an average flake is about 3-4lb's, if your hay is different please specify in the other section.**

17. How many flakes of each type of hay do you feed per day?

|                   | 1                     | 2                     | 3                     | 4                     | 5                     | 6                     | 7                     | 8                     | 9                     | 10                    | >10                   |
|-------------------|-----------------------|-----------------------|-----------------------|-----------------------|-----------------------|-----------------------|-----------------------|-----------------------|-----------------------|-----------------------|-----------------------|
| Grass             | <input type="radio"/> |
| Alfalfa           | <input type="radio"/> |
| Oat               | <input type="radio"/> |
| Grass/Alfalfa mix | <input type="radio"/> |

Other/Comments

\* 18. Do you feed a cubed or a complete pelleted diet (such as equine senior)?

Yes    If Yes, go to question 19

No    If No, go to question 21

**1 large hand held scoop of most grains = about 4 pounds**  
**1 quart (or 1 liter) volume for most grains = about 1 pound**

19. How many pounds of each type of complete pelleted or cubed feed do you feed per day?

|                 | 1                     | 2                     | 3                     | 4                     | 5                     | 6                     | 7                     | 8                     | 9                     | 10                    | >10                   |
|-----------------|-----------------------|-----------------------|-----------------------|-----------------------|-----------------------|-----------------------|-----------------------|-----------------------|-----------------------|-----------------------|-----------------------|
| Grass pellet    | <input type="radio"/> |
| Alfalfa pellet  | <input type="radio"/> |
| Complete pellet | <input type="radio"/> |
| Alfalfa cubes   | <input type="radio"/> |
| Grass cubes     | <input type="radio"/> |

Other (please specify with amount)

20. If you selected any of the above, what is the name and brand of the feed?

|                 |                      |
|-----------------|----------------------|
| Grass pellet    | <input type="text"/> |
| Alfalfa pellet  | <input type="text"/> |
| Complete pellet | <input type="text"/> |
| Alfalfa cubes   | <input type="text"/> |
| Grass cubes     | <input type="text"/> |
| Other:          | <input type="text"/> |

\* 21. Do you feed any concentrates or other feeds (sweet feed, grain, bran, etc)?

Yes If Yes, go to question 22

No If No, go to question 24

**1 large hand held scoop of most grains = about 4 pounds**  
**1 quart (or 1 liter) volume for most grains = about 1 pound**

22. How many pounds of sweet feed do you feed per day?

|                | 1                     | 2                     | 3                     | 4                     | 5                     | 6                     | 7                     | 8                     | 9                     | 10                    | >10                   |
|----------------|-----------------------|-----------------------|-----------------------|-----------------------|-----------------------|-----------------------|-----------------------|-----------------------|-----------------------|-----------------------|-----------------------|
| Rice Bran      | <input type="radio"/> |
| Corn           | <input type="radio"/> |
| Oats           | <input type="radio"/> |
| Beet Pulp      | <input type="radio"/> |
| Wheat Bran     | <input type="radio"/> |
| Sweet Feed Mix | <input type="radio"/> |

Other (please specify)

23. If you selected any of the above, what is the name and brand of the feed?

|                |                      |
|----------------|----------------------|
| Rice Bran      | <input type="text"/> |
| Corn           | <input type="text"/> |
| Oats           | <input type="text"/> |
| Beet Pulp      | <input type="text"/> |
| Wheat Bran     | <input type="text"/> |
| Sweet feed mix | <input type="text"/> |
| Other:         | <input type="text"/> |

\* 24. Do you use a combination supplement that includes both selenium and vitamin E?

Yes If Yes, go to question 25

No If No, go to question 32

Combination Vitamin E and Selenium

The following questions pertain to combination vitamin E and selenium supplements.

25. Is your combination product oral or injectable?

- Oral
- Injectable

26. Is your combination product a powder or a liquid?

- Powder
- Liquid

27. Is the vitamin E in the supplement from a natural or synthetic source?

- Natural
- Synthetic
- I'm not sure

28. Is the selenium in your product an enriched yeast or sodium selenite based?

- Enriched yeast
- Sodium selenite
- I'm not sure

29. How frequently do you supplement?

30. How much of the combination product do you administer at each supplementation event?

Example: 1 scoop, 1mg or unit

31. What is the name and brand of the combination supplement?

\* 32. Do you use a single vitamin E (not in combination with selenium) supplement?

Yes If Yes, go to question 33

No If No, go to question 39

Vitamin E Supplementation

**The following questions pertain to vitamin E supplements not in combination with selenium**

33. It is a powder or liquid?

Powder

Liquid

34. Is it an oral or injectable product?

Oral

Injectable

35. Is it a natural or synthetic vitamin E source?

Natural

Synthetic

I'm not sure

36. How frequently do you supplement?

37. How much do you administer (volume and units of Vitamin E per supplementation)?

Example - 1 scoop, 1,000 units

38. What is the name and brand of your supplement?

\* 39. Do you use a single selenium (not in combination with vitamin E) supplement?

Yes    If Yes, go to question 40

No    If No, go to question 46

Selenium Supplementation

The following questions pertain to selenium supplements not in combination with vitamin E

40. Is it an oral or injectable product?

- Oral
- Injectable

41. Is it a powder or liquid form?

- Powder
- Liquid

42. Is it enriched yeast or sodium selenite based?

- Enriched yeast
- Sodium Selenite
- I'm not sure

43. How frequently do you supplement?

44. How much do you administer (volume and amount of selenium it provides if known, with units)?

Example: 1 scoop, 1mg

45. What is the name and brand of your selenium supplement?

\* 46. Do you feed any other supplements?

Yes If Yes, go to question 47

No If No, go to question 49

47. Which supplements do you feed?

- Electrolytes
- General multivitamin/mineral
- Antioxidants
- Joint Supplements  
(such as glucosamine, chondroitin, MSM)
- Amino acids/proteins (such as creatine, tryptophan)
- Oils/Fat supplements
- Other (please specify)

48. If you selected any of the above, what is the name and brand of the supplement?

Electrolytes

General multivitamin/mineral

Antioxidants

Chondroprotectives (such as glucosamine, chondroitin, MSM)

Amino acids/proteins (such as creatine, tryptophan)

Rice Bran/Oils/Fat supplements

Other (with amount):

49. Comments:
